# Supplementary material for: The influence of pH and divalent/monovalent cations on the internal electron transfer (IET), enzymatic activity, and structure of fructose dehydrogenase
Source: PubMed Central journal article supplement (PMC5937911; doi:10.1007/s00216-018-0991-0), 2018-03-22
Supplement: 216_2018_991_MOESM1_ESM.pdf [file 216_2018_991_MOESM1_ESM.pdf]

## **Analytical and Bioanalytical Chemistry**

### **Electronic Supplementary Material**

#### **The influence of pH and divalent/monovalent cations on the internal electron transfer (IET), enzymatic activity and structure of fructose dehydrogenase**

Paolo Bollella, Yuya Hibino, Kenji Kano, Lo Gorton, Riccarda Antiochia

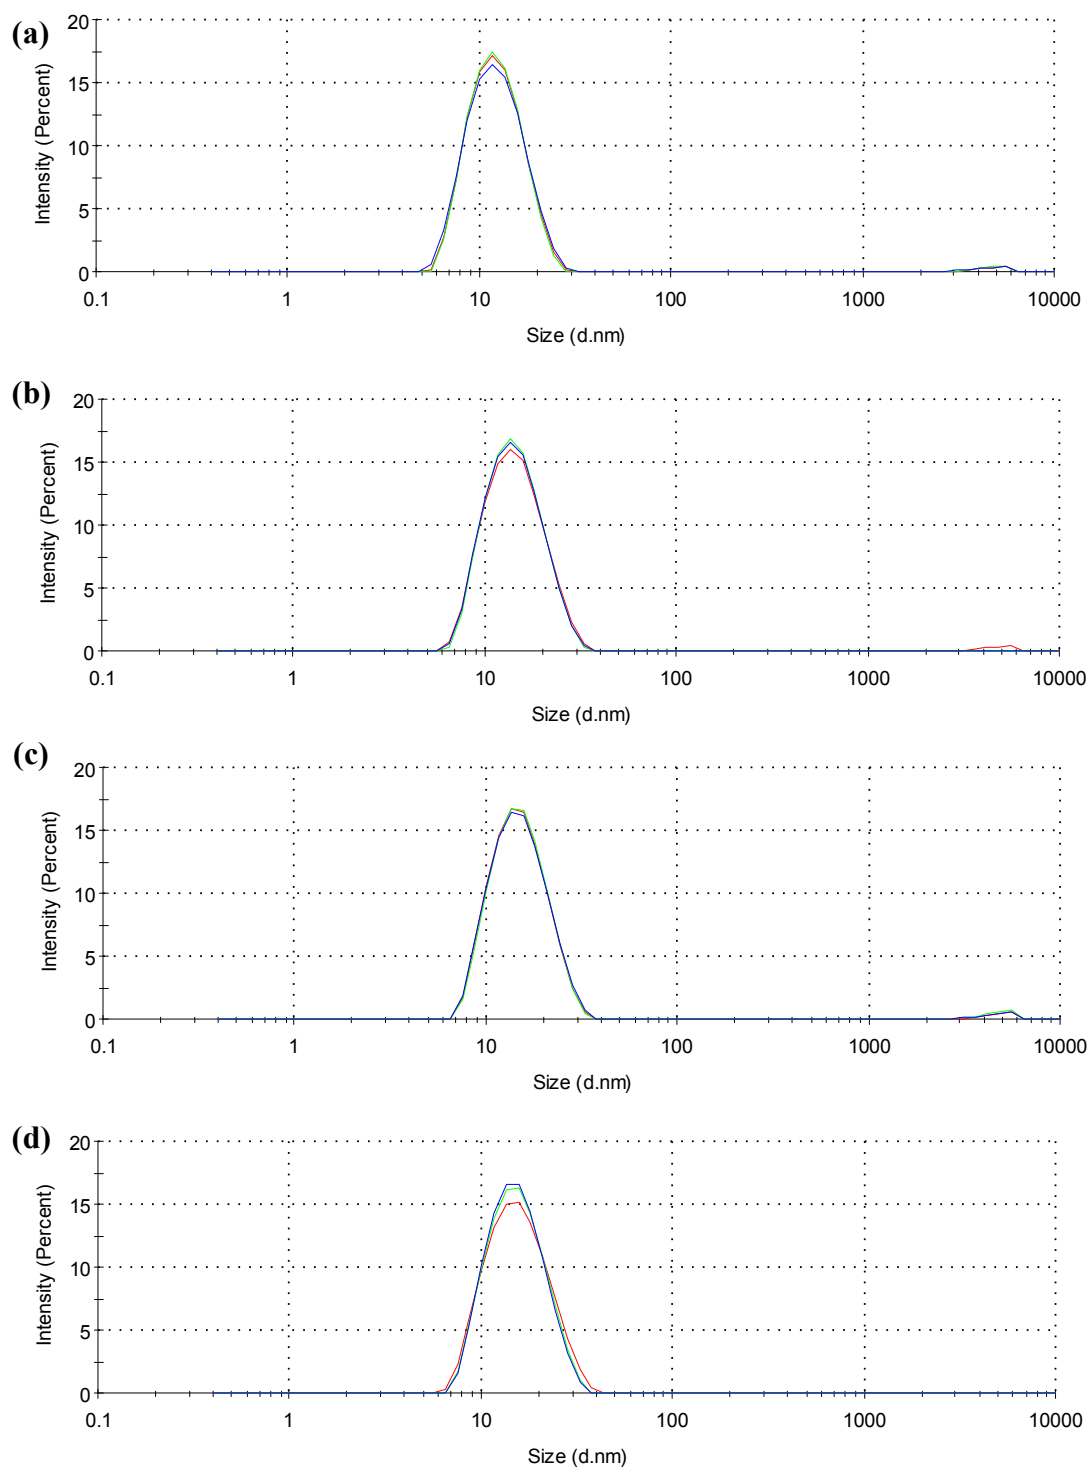

**Fig. S1** DLS measurements performed with a  $0.15 \text{ mg mL}^{-1}$  solution of fructose dehydrogenase (FDH) from *Gluconobacter japonicus* in 10 mM  $\text{NaH}_2\text{PO}_4$  pH 4.5 (3 repetitions, 12 runs) at different NaCl concentrations: 0 mM (a), 10 mM (b), 50 mM (c) and 100 mM (d)

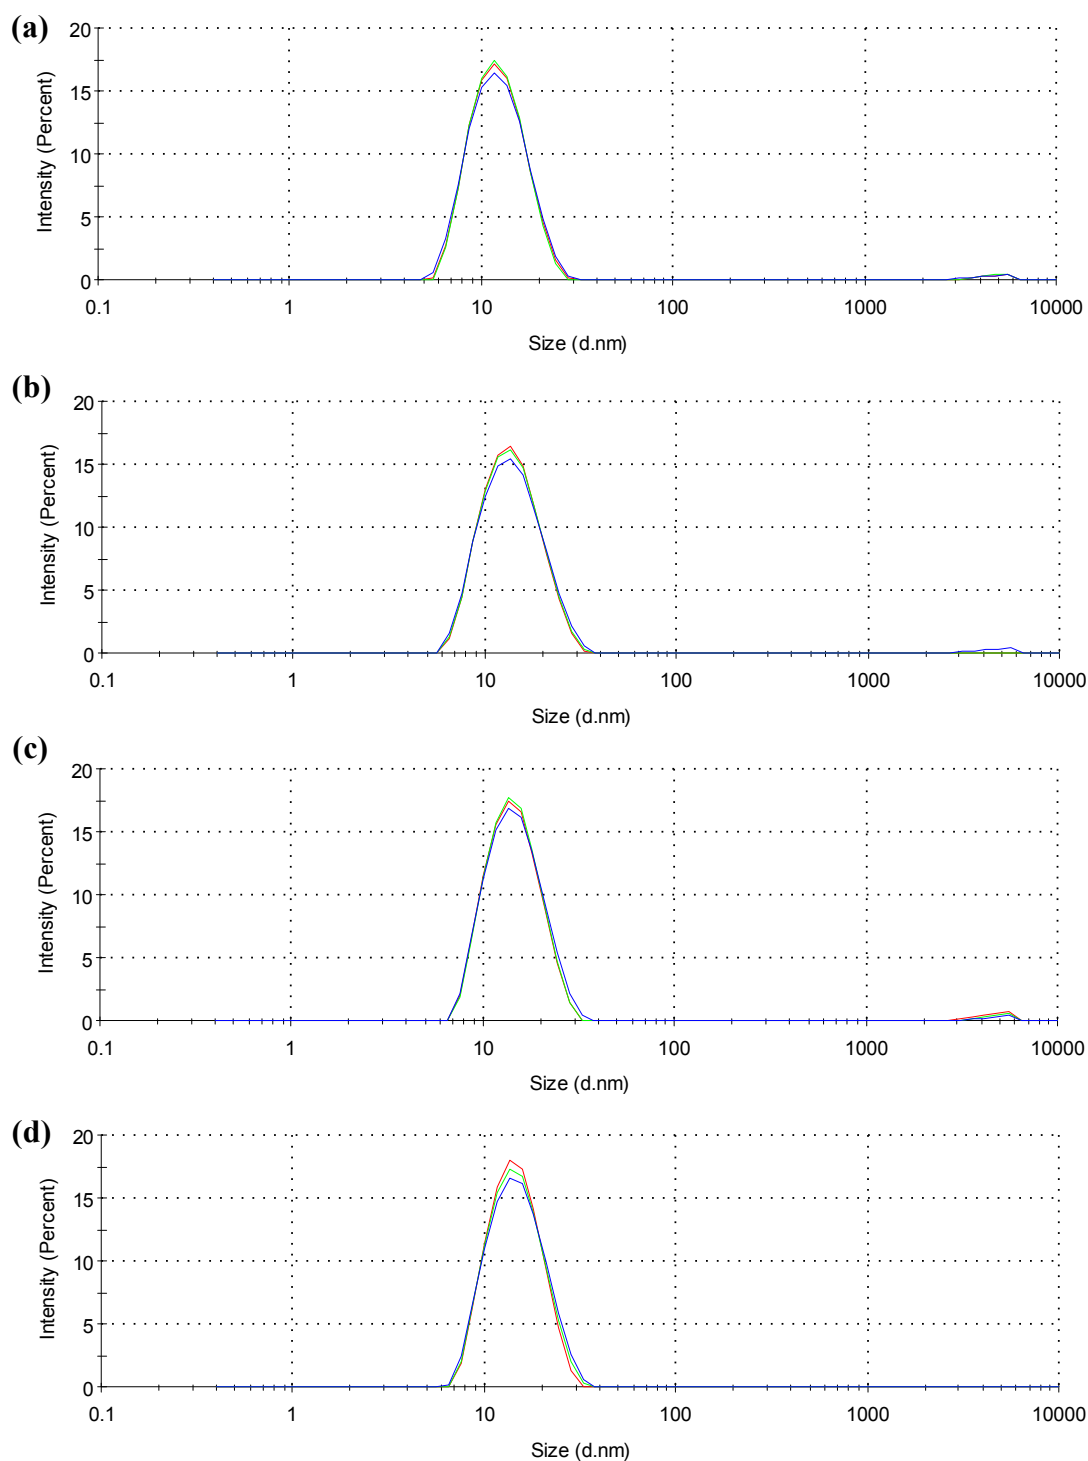

**Fig. S2** DLS measurements performed with a  $0.15 \text{ mg mL}^{-1}$  solution of fructose dehydrogenase (FDH) from *Gluconobacter japonicus* in  $10 \text{ mM NaH}_2\text{PO}_4$  pH 4.5 (3 repetitions, 12 runs) at different KCl concentrations: 0 mM (a), 10 mM (b), 50 mM (c) and 100 mM (d)

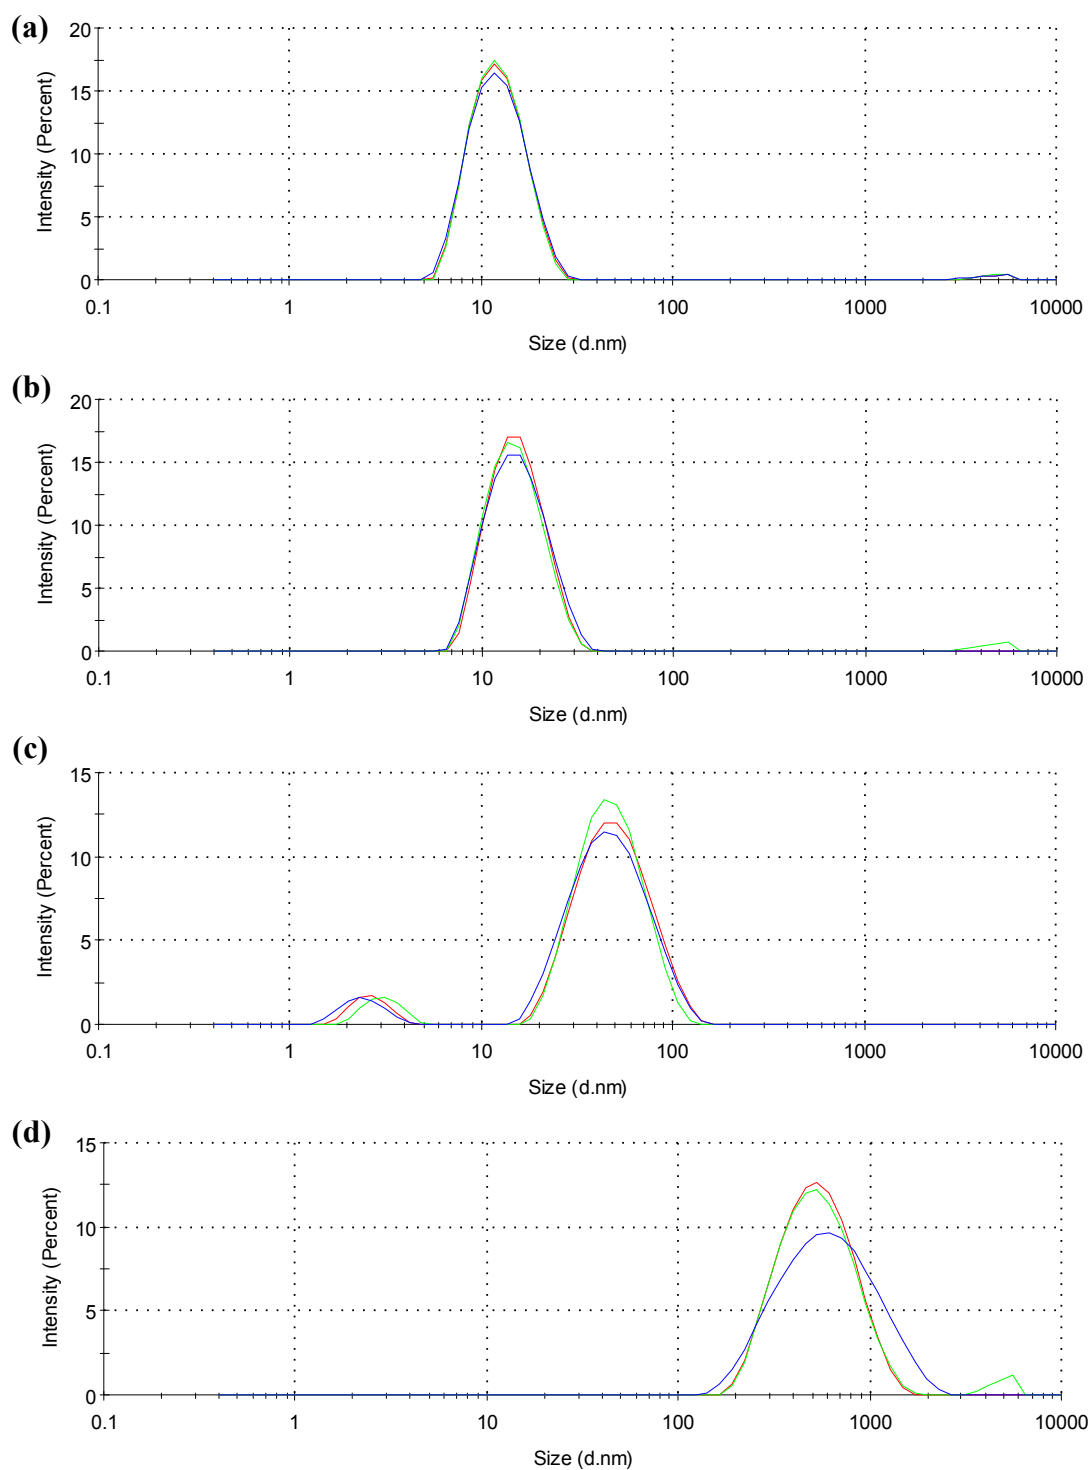

**Fig. S3** DLS measurements performed with a 0.15 mg mL<sup>-1</sup> solution of fructose dehydrogenase (FDH) from *Gluconobacter japonicus* in 10 mM NaH<sub>2</sub>PO<sub>4</sub> pH 4.5 (3 repetitions, 12 runs) at different CaCl<sub>2</sub> concentrations: 0 mM (a), 10 mM (b), 50 mM (c) and 100 mM (d)

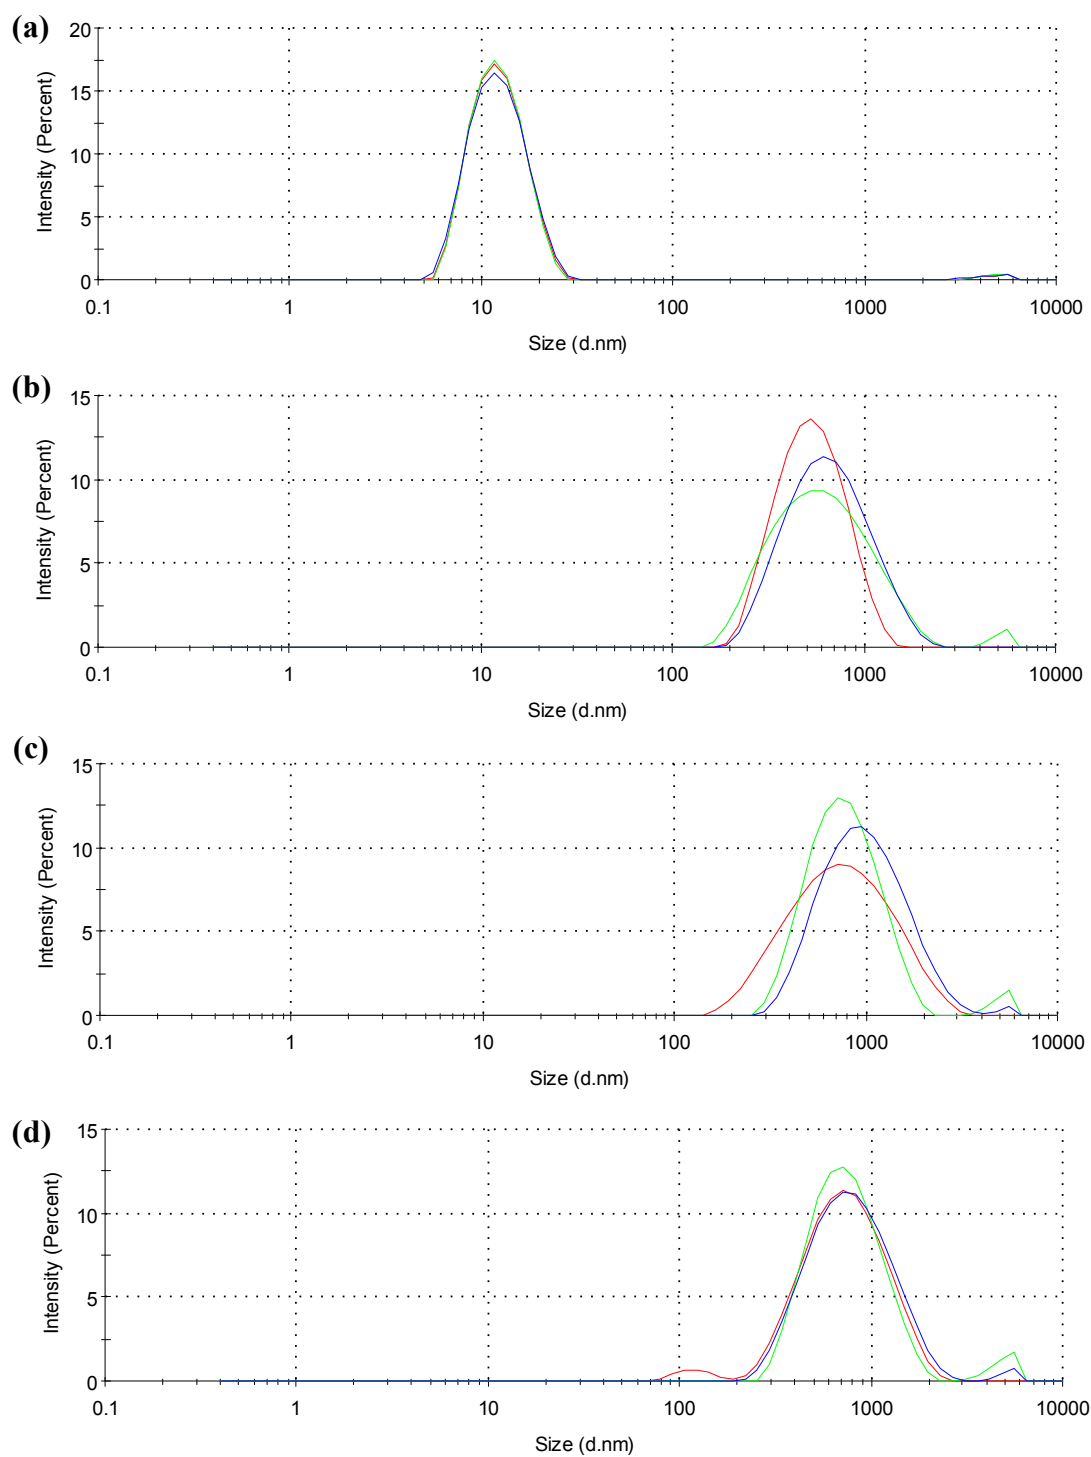

**Fig. S4** DLS measurements performed with a  $0.15 \text{ mg mL}^{-1}$  solution of fructose dehydrogenase (FDH) from *Gluconobacter japonicus* in  $10 \text{ mM NaH}_2\text{PO}_4$  pH 4.5 (3 repetitions, 12 runs) at different  $\text{MgCl}_2$  concentrations:  $0 \text{ mM}$  (a),  $10 \text{ mM}$  (b),  $50 \text{ mM}$  (c) and  $100 \text{ mM}$  (d)

**Table S1** DLS measurements performed with a  $0.15 \text{ mg mL}^{-1}$  solution of fructose dehydrogenase (FDH) from *Gluconobacter japonicus* in  $10 \text{ mM NaH}_2\text{PO}_4$  pH 4.5 (3 repetitions, 12 runs) at different NaCl, KCl,  $\text{CaCl}_2$ ,  $\text{MgCl}_2$  concentrations

| <b>Buffer <math>10 \text{ mM NaH}_2\text{PO}_4</math> pH 4.5</b> | <b>PDI</b>        | <b>d.(nm)</b>    |
|------------------------------------------------------------------|-------------------|------------------|
| <b>No salt added</b>                                             | $0.145 \pm 0.005$ | $12.6 \pm 0.2$   |
| <b>10 mM NaCl</b>                                                | $0.135 \pm 0.003$ | $14.8 \pm 0.1$   |
| <b>50 mM NaCl</b>                                                | $0.154 \pm 0.005$ | $15.5 \pm 0.1$   |
| <b>100 mM NaCl</b>                                               | $0.123 \pm 0.008$ | $15.9 \pm 0.2$   |
| <b>10 mM KCl</b>                                                 | $0.134 \pm 0.011$ | $14.3 \pm 0.1$   |
| <b>50 mM KCl</b>                                                 | $0.148 \pm 0.014$ | $14.9 \pm 0.2$   |
| <b>100 mM KCl</b>                                                | $0.091 \pm 0.011$ | $15.1 \pm 0.2$   |
| <b>10 mM <math>\text{CaCl}_2</math></b>                          | $0.130 \pm 0.004$ | $15.6 \pm 0.3$   |
| <b>50 mM <math>\text{CaCl}_2</math></b>                          | $0.311 \pm 0.007$ | $52.4 \pm 1.5$   |
| <b>100 mM <math>\text{CaCl}_2</math></b>                         | $0.244 \pm 0.012$ | $606.7 \pm 67.0$ |
| <b>10 mM <math>\text{MgCl}_2</math></b>                          | $0.240 \pm 0.045$ | $652.5 \pm 79.2$ |
| <b>50 mM <math>\text{MgCl}_2</math></b>                          | $0.292 \pm 0.027$ | $915.1 \pm 85.1$ |
| <b>100 mM <math>\text{MgCl}_2</math></b>                         | $0.273 \pm 0.009$ | $811.5 \pm 35.9$ |
